# Supplementary material for: Sudden Infant Death Associated with Rhinovirus Infection
Source: MDPI journal article supplement (doi:10.3390/v16040518), 2024-03-27
Supplement: s1 [file s1]

**Table S1. Primers used in-house PCRs**

| <b>A) Primers for EVs and RVs; End-point PCRs for typing and sequencing</b>            |                                     |                     |
|----------------------------------------------------------------------------------------|-------------------------------------|---------------------|
| <b>Complete VP1, EV-B</b>                                                              |                                     |                     |
| HEVB-S1695                                                                             | CTTGTGCTTTGTGTCGGCRTGYAAYGAYTTYTCWG | PCR1                |
| EV2C                                                                                   | CAATACGGCATTGGAAGTGAAGTGTATG        |                     |
| HEVB-S1695                                                                             | CTTGTGCTTTGTGTCGGCRTGYAAYGAYTTYTCWG | nested PCR          |
| HEVB-R132                                                                              | GGTGCTCACTAGGAGGTCYCTRTTARTCYTCCCA  |                     |
| P1S1695S                                                                               | CTTGTGCTTTGTGTCGGC                  | Sequencing          |
| P2R132S                                                                                | GGTGCTCACTAGGAGGTC                  |                     |
| <b>Partial VP1, generic EV</b>                                                         |                                     |                     |
| 224                                                                                    | GCIATGYTIGGIACICAYRT                | PCR1                |
| 222                                                                                    | CICIGGIGGIAYRWACAT                  |                     |
| AN89                                                                                   | CCAGCACTGACAGCAGYNGARAYNGG          | nested PCR          |
| AN88                                                                                   | TACTGGACCACCTGGNGGNAYRWACAT         |                     |
| AN232                                                                                  | CCAGCACTGACAGCA                     | Sequencing          |
| AN233                                                                                  | TACTGGACCACCTGG                     |                     |
| <b>VP4-VP2, generic RV,</b>                                                            |                                     |                     |
| RV Savo Sense                                                                          | GGGACCAACTACTTTGGGTGTCCGTGT         | PCR1 and sequencing |
| RV Savo Rev                                                                            | GCATC9GGYARYTTCCACCACCANCC          |                     |
| <b>B) Primers and probes for gastroenteritis viruses; real time PCRs for detection</b> |                                     |                     |
| <b>Aichi Virus</b>                                                                     |                                     |                     |
| AichiV-FW                                                                              | CCCAGTGTGCGTAACCTTCT                |                     |
| AichiV-Rev                                                                             | GTACCTGCCTGGCATYCCTA                |                     |
| AichiV-Probe                                                                           | ABY-ACG CCC TGT GCG GGA TGA AA-QSY  |                     |
| <b>Astrovirus</b>                                                                      |                                     |                     |
| ASTV-FW                                                                                | TCTYATAGACCGYATTATTGG               |                     |
| ASTV-REV                                                                               | TCAAATTCTACATCATCACCAA              |                     |
| ASTV-Probe                                                                             | FAM-CCCCADCCATCATCATCTTCATCA-QSY    |                     |
| <b>Bocavirus</b>                                                                       |                                     |                     |
| HBoV1FW                                                                                | CCTATATAAGCTGCTGCACTTCCTG           |                     |
| HBoV234FW                                                                              | GCACTTCCGCATYTCGTCAG                |                     |
| HBoV1Rev                                                                               | AAGCCATAGTAGACTCACCACAAG            |                     |
| HBoV3Rev                                                                               | GTGGATTGAAAGCCATAATTTGA             |                     |
| HBoV24Rev                                                                              | AGCAGAAAAGGCCATAGTGTC               |                     |
| H1234-Probe                                                                            | FAM-CCAGAGATGTTCACTCGCCG-NFQ-MGB    |                     |
| <b>Norovirus, Genogroup I</b>                                                          |                                     |                     |
| JJV1NFW                                                                                | CCATGTTCCGTTGGATGC                  |                     |
| JJV1Rev                                                                                | TCCTTAGACGCCATCATCAT                |                     |
| JJV1-Probe                                                                             | ABY-TGTGGACAGGAGATCGCAATCTC-QSY     |                     |
| RING-1b-Probe                                                                          | ABY-AGATCGCGGTCTCCTGTCCA-QSY        |                     |
| <b>Norovirus, Genogroup II</b>                                                         |                                     |                     |

|                                                                                                 |                                       |
|-------------------------------------------------------------------------------------------------|---------------------------------------|
| QNIF2dFW                                                                                        | ATG TTCAGRTGGATGAGRTTCTCWGA           |
| COG2Rev                                                                                         | TCGACGCCATCTTCATTCACA                 |
| QNIFSProbe                                                                                      | FAM-AGCACGTGGGAGGGCGATCG-QSY          |
|                                                                                                 |                                       |
| <b>Rotavirus Group A</b>                                                                        |                                       |
| VP2-F1-fw                                                                                       | TCTGCAGACAGTTGAACCTATTAA              |
| VP2-F2-fw                                                                                       | CAGACACGGTTGAACCCATTAA                |
| VP2-F3-fw                                                                                       | TCGGCTGATACAGTAGAACCTATAAATG          |
| VP2-F4-fw                                                                                       | TGTCAGCTGATACAGTAGAACCTATAAATG        |
| VP2-F5-fw                                                                                       | TCAGCTGACACAGTAGAACCTATAAATG          |
| VP2-R1-rev                                                                                      | GTTGGCGTTTACAGTTCGTTTCAT              |
| VP2-R2-rev                                                                                      | GTTGGCGTCTACAATTCGTTTCAT              |
| VP2-Probe                                                                                       | FAM-ATGCGCATRTRTCAA AHGCAA            |
|                                                                                                 |                                       |
| <b>Sapovirus</b>                                                                                |                                       |
| SaV124Fw                                                                                        | GAYCASGCTCTCGCYACCTAC                 |
| SaV1Fw                                                                                          | TTGGCCCTCGCCACCTAC                    |
| SaV1245Rev                                                                                      | CCCTCCATYTCA AACACTA                  |
| SaV124TProbe                                                                                    | FAM-CCRCCTATRAACCA-MGB                |
|                                                                                                 |                                       |
| MS2 phage                                                                                       | inhibition control                    |
| MS2-Fw                                                                                          | TGGCACTACCCCTCTCCGTATTCACG            |
| MS2-Rev                                                                                         | GTACGGGCGACCCACGATGAC                 |
| MS2-Probe                                                                                       | VIC-CACATCGATAGATCAAGGTGCCTACAAGC-QSY |
| An internal control of amplification was added for each PCR, that amplify the bacteriophage MS2 |                                       |
